# Supplementary material for: Evolutionary repair: Changes in multiple functional modules allow meiotic cohesin to support mitosis
Source: PubMed Central journal article supplement (PMC7138332; doi:10.1371/journal.pbio.3000635), 2020-03-10
Supplement: pbio.3000635.s004.pdf [file pbio.3000635.s004.pdf]

**A**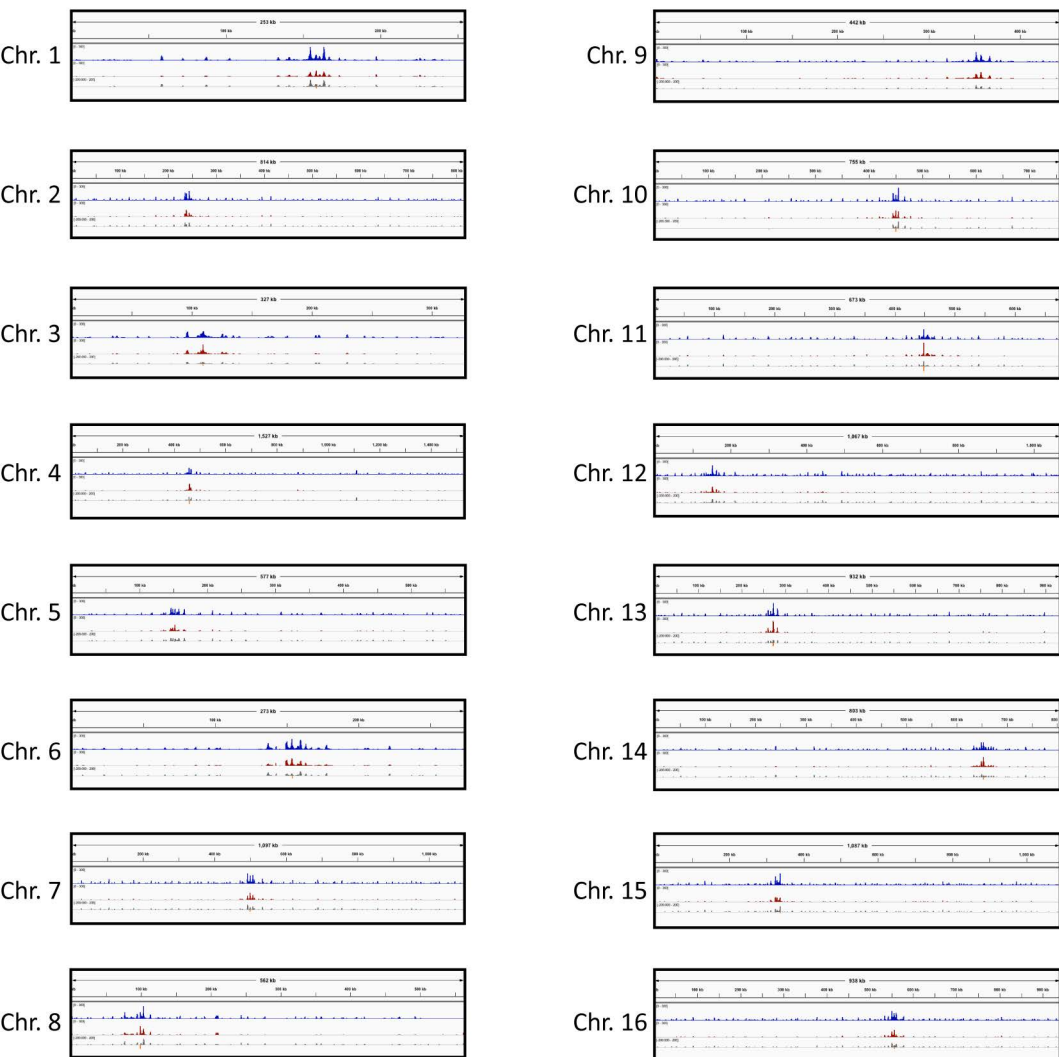

— *SCC1*  
— *REC8*  
—  $SCC1 - REC8 > 0$   
—  $SCC1 - REC8 < 0$

**B**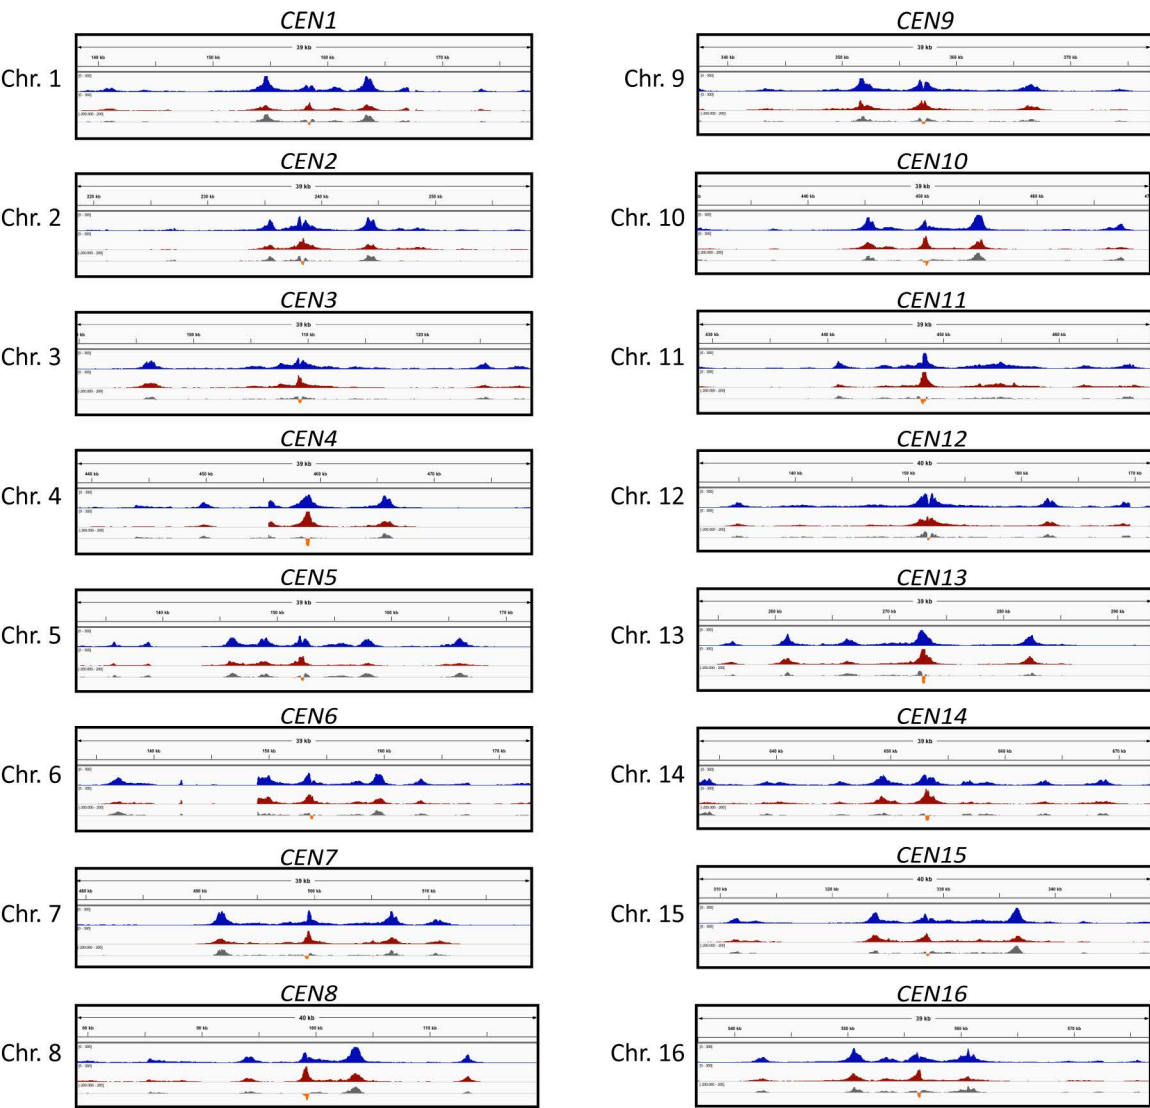

— SCC1  
— REC8  
—  $SCC1 - REC8 > 0$   
—  $SCC1 - REC8 < 0$
