# Supplementary material for: Evolutionary repair: Changes in multiple functional modules allow meiotic cohesin to support mitosis
Source: PubMed Central journal article supplement (PMC7138332; doi:10.1371/journal.pbio.3000635), 2020-03-10
Supplement: pbio.3000635.s018.pdf [file pbio.3000635.s018.pdf]

**S1 Table. Adaptive mutation fixed in each evolved population at generation 375**

| <b>Population</b> | <b>Gene</b> | <b>Nucleotide Change</b> | <b>Amino Acid change</b> |
|-------------------|-------------|--------------------------|--------------------------|
| <b>P1</b>         | <i>SSN2</i> | 3031 C -> T              | 1011 stop codon          |
| <b>P2</b>         | <i>SSN2</i> | 2774 T -> G              | 925 I -> S               |
| <b>P3</b>         | <i>SSN8</i> | 817 +T                   | 273 stop codon           |
| <b>P4</b>         | <i>SSN3</i> | 108 del                  | 36 stop codon            |
| <b>P5</b>         | <i>SSN2</i> | 2555 T -> A              | 852 stop codon           |
| <b>P6</b>         | <i>SRB7</i> | 230 T -> G               | 77 I -> S                |
| <b>P7</b>         | <i>SSN2</i> | 3258 C -> A              | 1086 stop codon          |
| <b>P8</b>         | <i>ESPI</i> | 2537 C -> T              | 846 C -> Y               |
| <b>P9</b>         | <i>SSN3</i> | 253 del                  | 94 stop codon            |
| <b>P10</b>        | <i>SRB8</i> | 4239 C -> G              | 1413 N -> K              |
| <b>P11</b>        | <i>NUT2</i> | 134 C -> A               | 45 A -> D                |
| <b>P12</b>        | <i>SIN4</i> | 2838 del                 | 947 T -> L               |
| <b>P13</b>        | <i>SRB8</i> | 3095 C -> A              | 1032 stop codon          |
|                   | <i>SMC3</i> | 3623 G -> A              | 1208 T -> M              |
| <b>P14</b>        | <i>SSN8</i> | 197 A -> T               | 66 stop codon            |
| <b>P15</b>        | <i>SSN2</i> | 3058 T -> A              | 1020 stop codon          |
|                   | <i>SMC1</i> | 1253 A -> C              | 418 Q -> P               |
|                   | <i>ESPI</i> | 3719 A -> T              | 1240 I -> N              |
