# Supplementary material for: Evolutionary repair: Changes in multiple functional modules allow meiotic cohesin to support mitosis
Source: PubMed Central journal article supplement (PMC7138332; doi:10.1371/journal.pbio.3000635), 2020-03-10
Supplement: pbio.3000635.s019.pdf [file pbio.3000635.s019.pdf]

**S2 Table. Adaptive mutations fixed in each evolved population at generation 1750**

| <b>Population</b> | <b>Gene</b> | <b>Nucleotide Change</b>  | <b>Amino Acid change</b> |
|-------------------|-------------|---------------------------|--------------------------|
| <b>P1</b>         | <i>SSN2</i> | 3031 C -> T               | 1011 stop codon          |
|                   | <i>ESP1</i> | 2537 C -> T               | 846 C -> Y               |
| <b>P2</b>         | <i>SSN2</i> | 2774 T -> G               | 925 I -> S               |
|                   | <i>SMC3</i> | 895 C -> G                | 299 A -> P               |
| <b>P3</b>         | <i>SSN8</i> | 817 +T                    | 273 stop codon           |
|                   | <i>SWI4</i> | 1906 T -> A, 1993 C -> A  | 635 N -> Y, 665 G -> C   |
|                   | <i>CLN2</i> | 745 G -> A                | 249 stop codon           |
| <b>P4</b>         | <i>SSN3</i> | 108 del                   | 36 stop codon            |
|                   | <i>SMC3</i> | 1131 T -> G               | 377 Q -> H               |
| <b>P5</b>         | <i>SSN2</i> | 2555 T -> A               | 852 stop codon           |
|                   | <i>SMC3</i> | 88 T -> C                 | 30 I -> V                |
| <b>P6</b>         | <i>SRB7</i> | 230 T -> G                | 77 I -> S                |
|                   | <i>ESP1</i> | 3580 G -> C               | 1194 H -> D              |
| <b>P7</b>         | <i>SSN2</i> | 3258 C -> A               | 1086 stop codon          |
|                   | <i>SWI6</i> | 2144 C -> A               | 715 stop codon           |
| <b>P8</b>         | <i>ESP1</i> | 2537 C -> T               | 846 C -> Y               |
|                   | <i>SMC3</i> | 1622 C -> T               | 941 G -> D               |
| <b>P9</b>         | <i>SSN3</i> | 253 del                   | 94 stop codon            |
|                   | <i>CLN2</i> | 622 C -> T                | 208 E -> K               |
| <b>P10</b>        | <i>SRB8</i> | 4239 C -> G               | 1413 N -> K              |
| <b>P11</b>        | <i>NUT2</i> | 134 C -> A                | 45 A -> D                |
|                   | <i>SMC3</i> | 2530 G -> C               | 844 L -> V               |
|                   | <i>SMC1</i> | 2232 G -> T               | 744 E -> D               |
|                   | <i>MBP1</i> | 1512 A -> +T, 1513 C -> T | 510 stop codon           |
| <b>P12</b>        | <i>SIN4</i> | 2838 del                  | 947 T -> L               |
|                   | <i>SRB8</i> | 1058 del                  | 354 stop codon           |
|                   | <i>SMC3</i> | 2351 G -> T               | 784 F -> K               |
| <b>P13</b>        | <i>SRB8</i> | 3095 C -> A               | 1032 stop codon          |
|                   | <i>SMC3</i> | 3623 G -> A               | 1208 T -> M              |
|                   | <i>CLN2</i> | 375 C -> T                | 125 stop codon           |
| <b>P14</b>        | <i>SSN8</i> | 197 A -> T                | 66 stop codon            |
| <b>P15</b>        | <i>SSN2</i> | 3058 T -> A               | 1020 stop codon          |
|                   | <i>SMC1</i> | 1253 A -> C               | 418 Q -> P               |
|                   | <i>ESP1</i> | 3719 A -> T               | 1240 I -> N              |
|                   | <i>MBP1</i> | 1268 C -> A               | 423 stop codon           |
