# Supplementary material for: Evolutionary repair: Changes in multiple functional modules allow meiotic cohesin to support mitosis
Source: PubMed Central journal article supplement (PMC7138332; doi:10.1371/journal.pbio.3000635), 2020-03-10
Supplement: pbio.3000635.s020.pdf [file pbio.3000635.s020.pdf]

**S3 Table. Primers used for ChIP-qPCR**

| <b>Primer</b> | <b>Chromosomal Position</b> | <b>Sequence</b>        |
|---------------|-----------------------------|------------------------|
| AM792         | IV-c1                       | ACACGAGCCAGAAATAGTAAC  |
| AM793         | IV-c1                       | TGATTATAAGCATGTGACCTTT |
| AM794         | IV-c2                       | CCGAGGCTTTCATAGCTTA    |
| AM795         | IV-c2                       | ACCGGAAGGAAGAATAAGAA   |
| AM1319        | IV-p1                       | ATGATTCAATGGATTTAGCC   |
| AM1320        | IV-p1                       | GTCAGTCTTATGCTGTTCCC   |
| AM782         | IV-a1                       | AGATGAAACTCAGGCTACCA   |
| AM783         | IV-a1                       | TGCAACATCGTTAGTTCTTG   |
| oPH622        | Spombe-otr1                 | AATTGTGGTGGTGTGGTAATAC |
| oPH623        | Spombe-otr1                 | GGGTCATCGTTTCCATTCAG   |
