# Supplementary material for: Evolutionary repair: Changes in multiple functional modules allow meiotic cohesin to support mitosis
Source: PubMed Central journal article supplement (PMC7138332; doi:10.1371/journal.pbio.3000635), 2020-03-10

Fig 2A. Raw Image

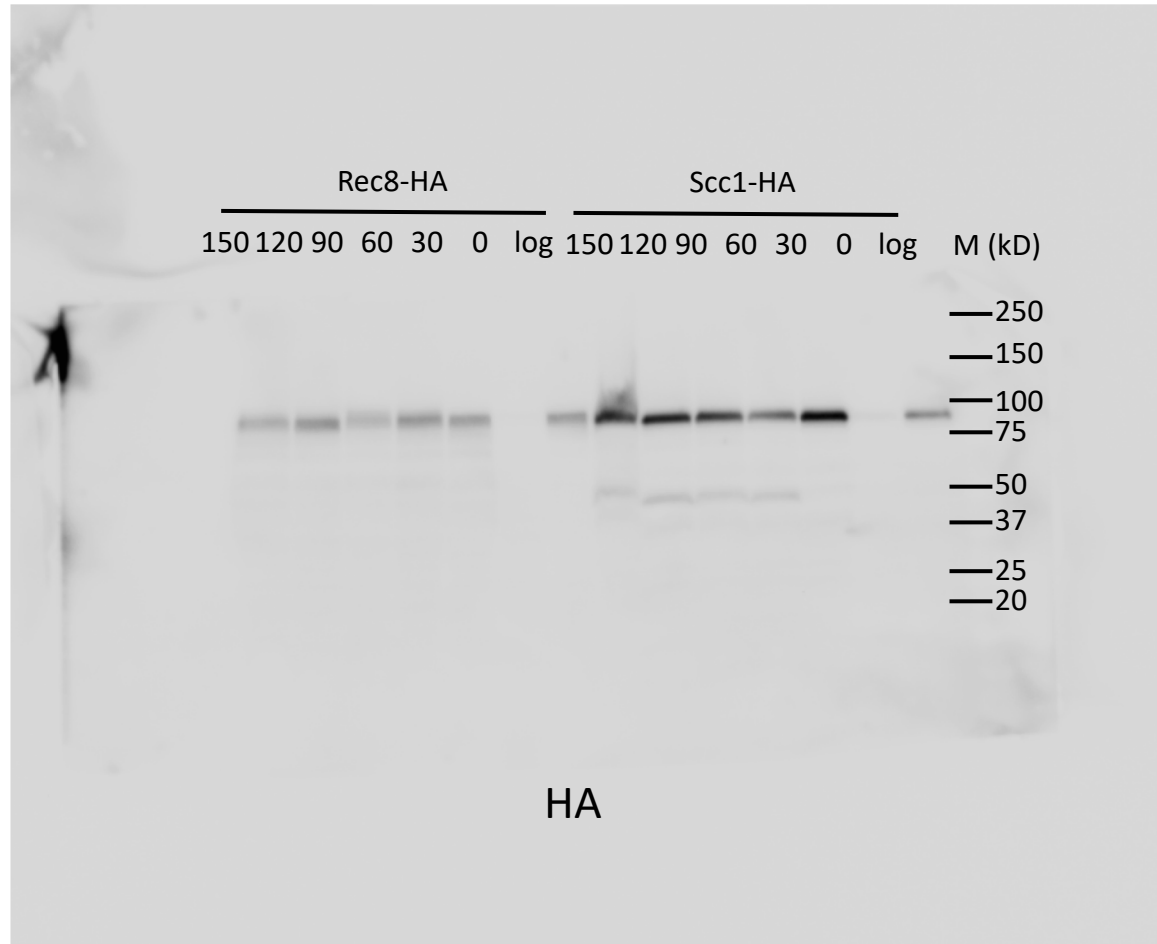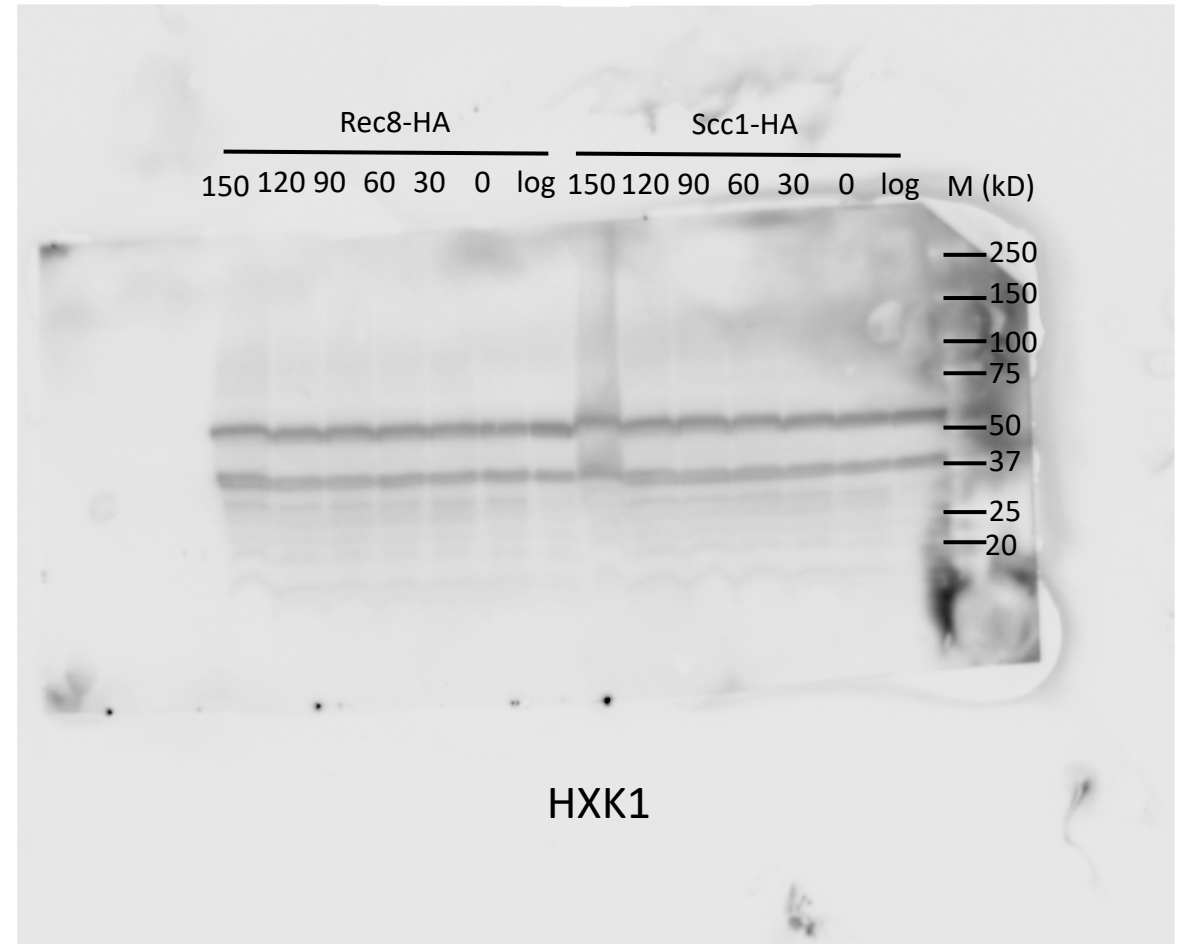

Fig 2B. Raw Image

Scc1-HA

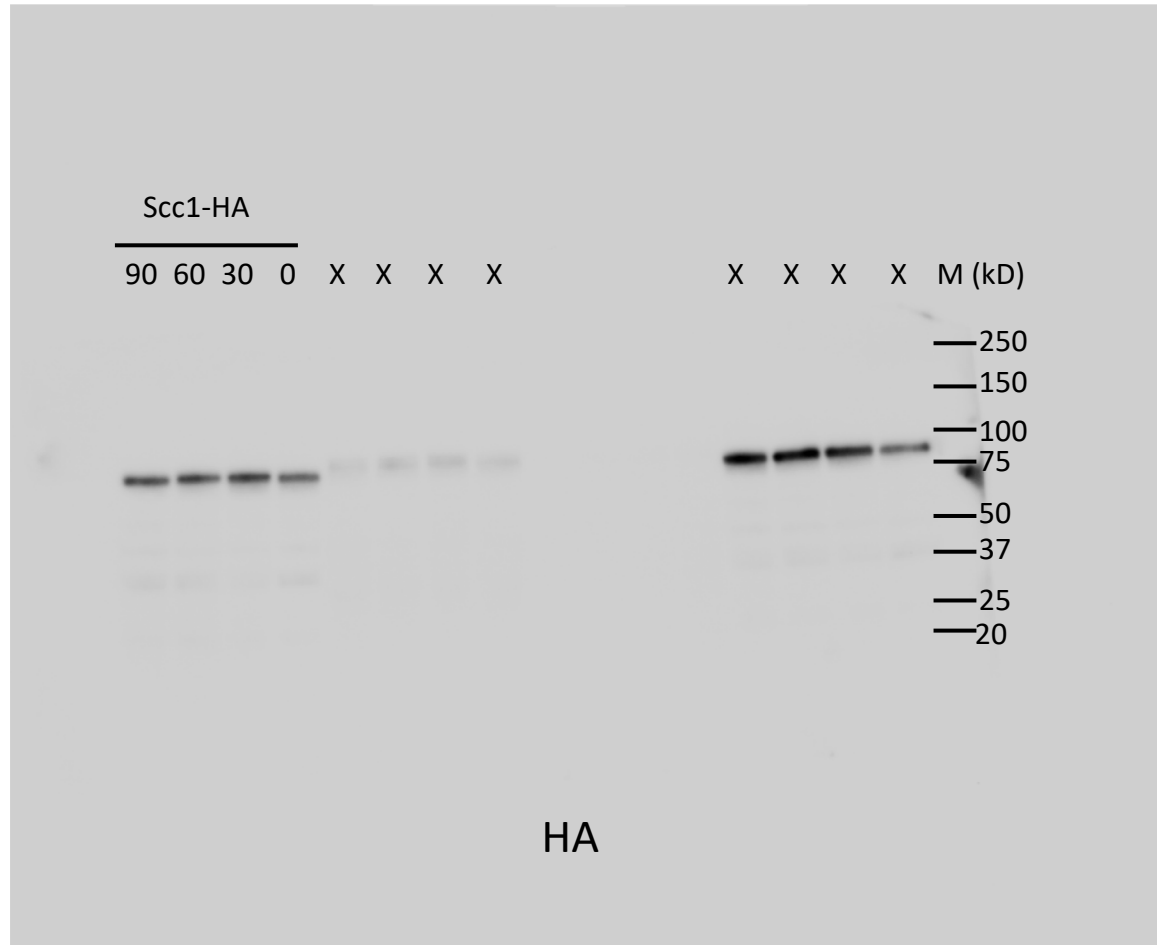

Rec8 -HA

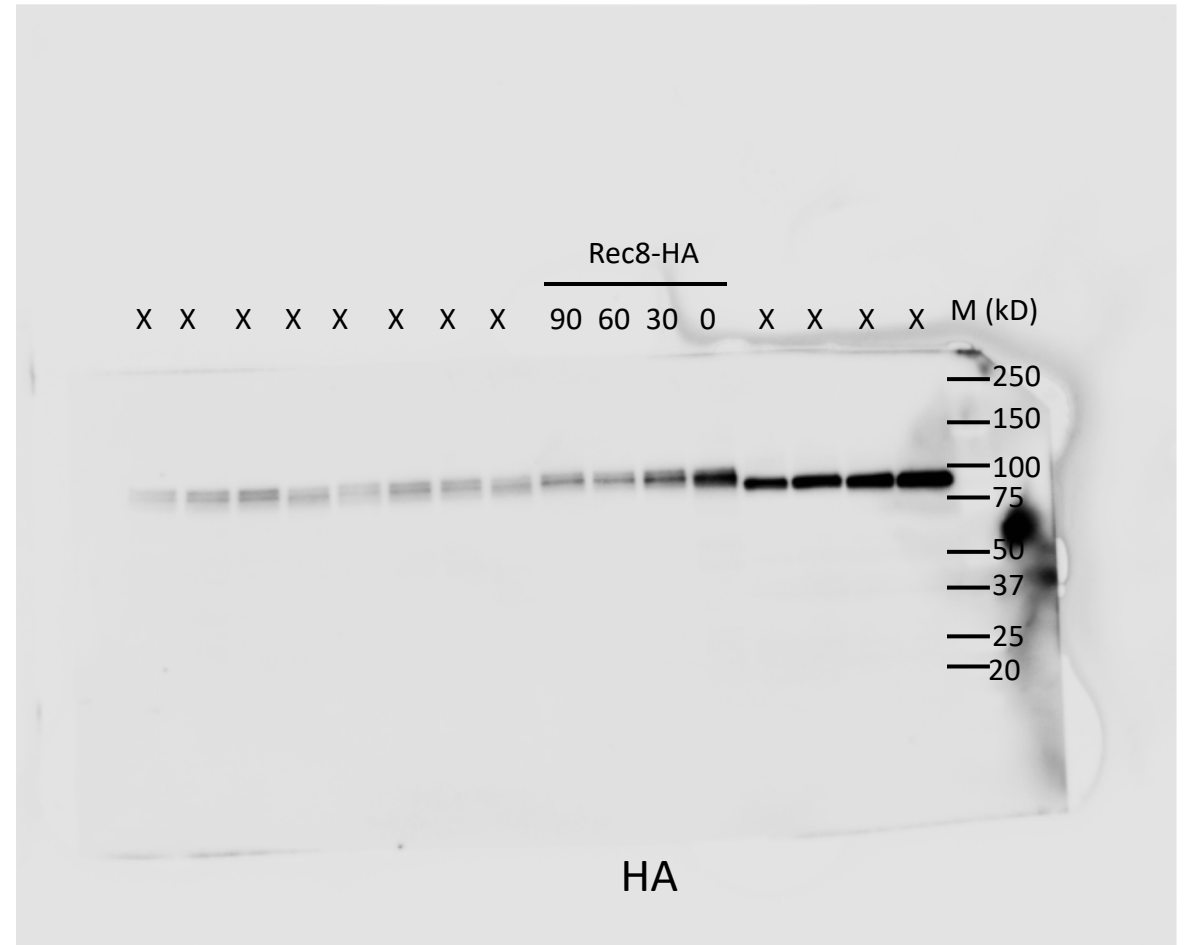

Fig 2B. Raw Image

Rec8-HA+ *esp1-1*

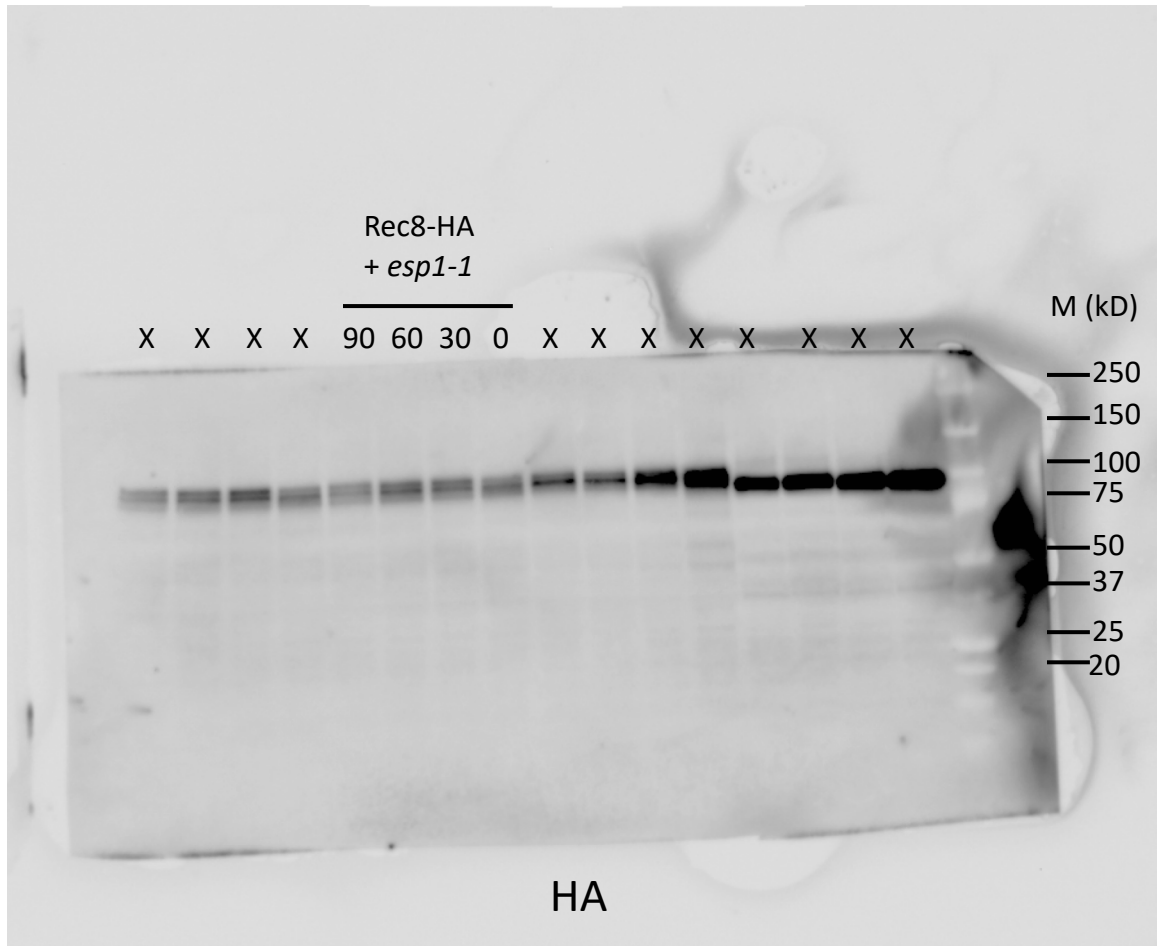

S5A Fig. Raw Image

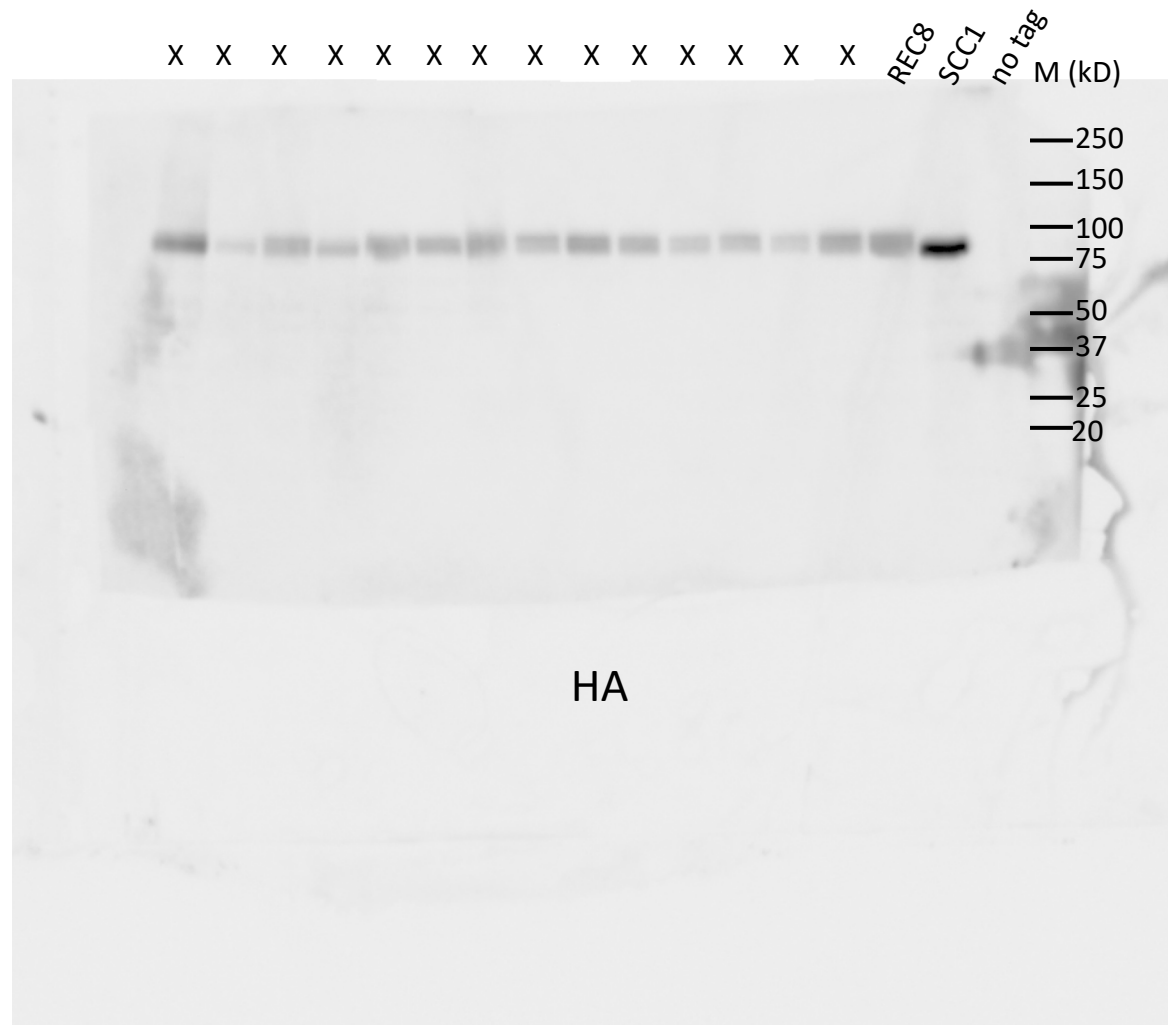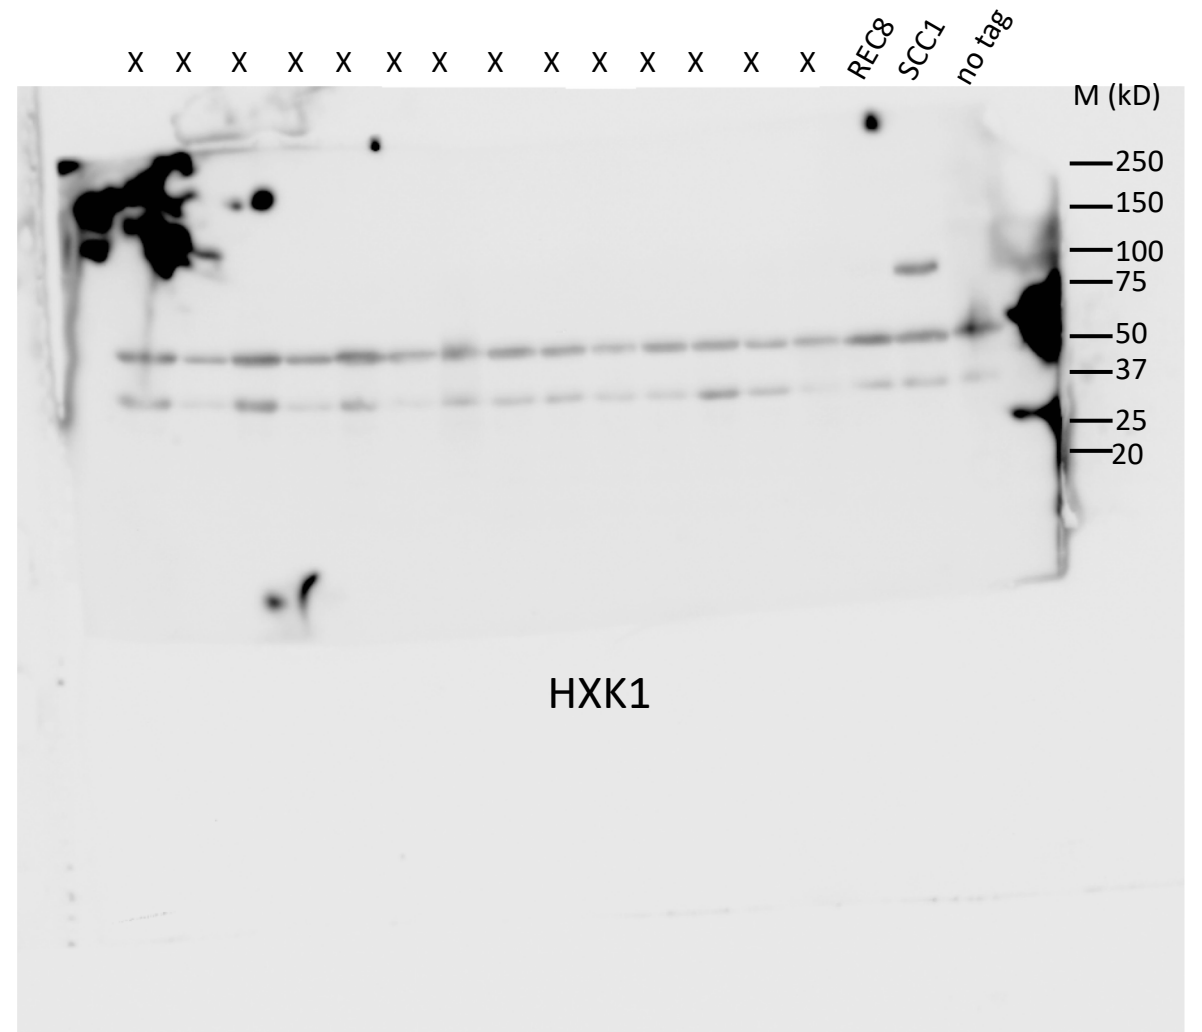



# S5B Fig. Raw Image

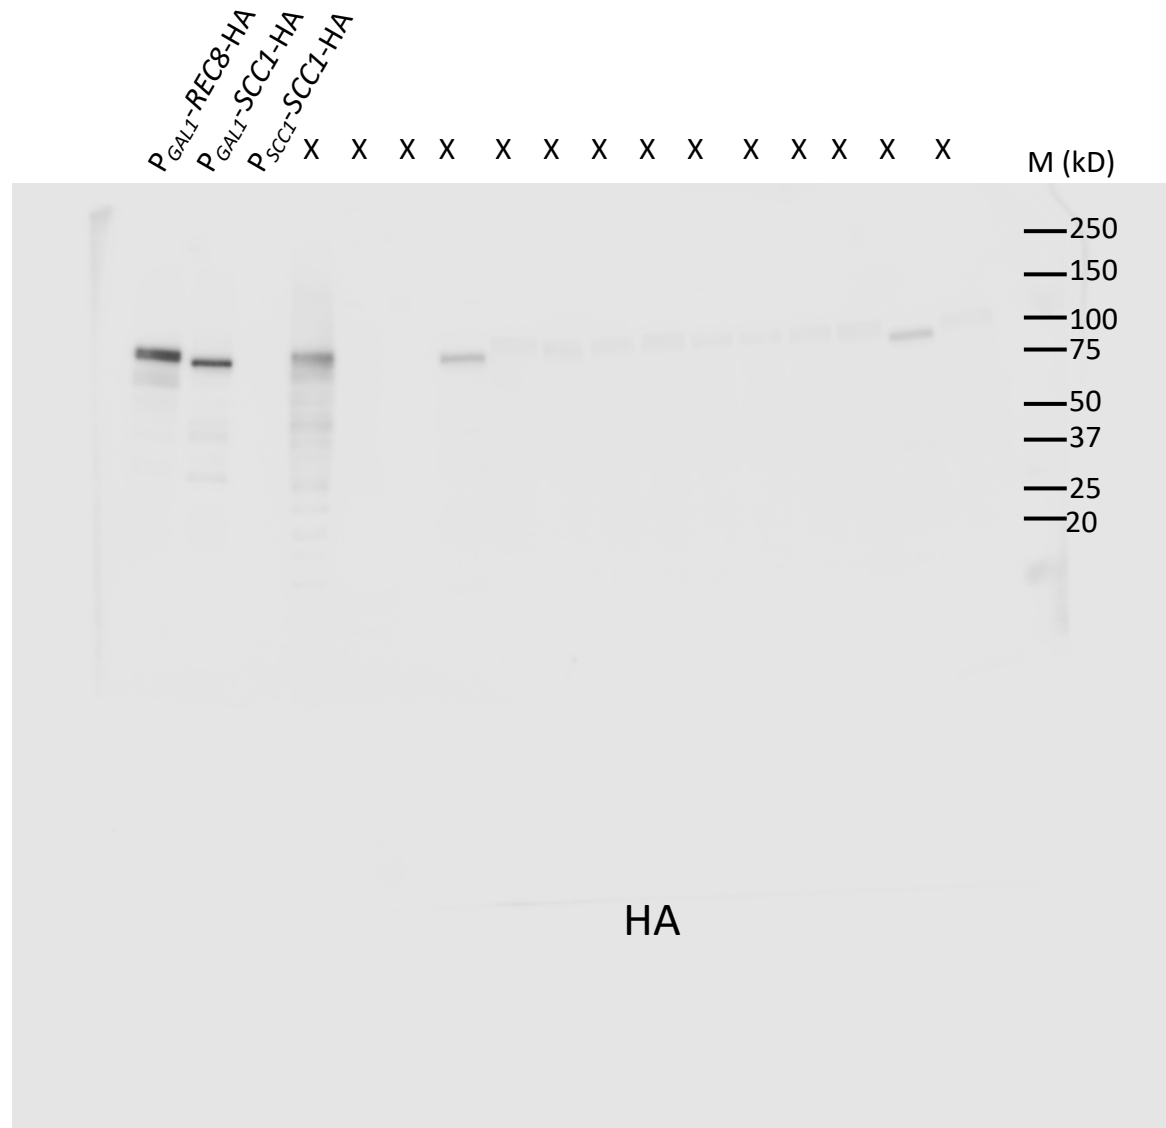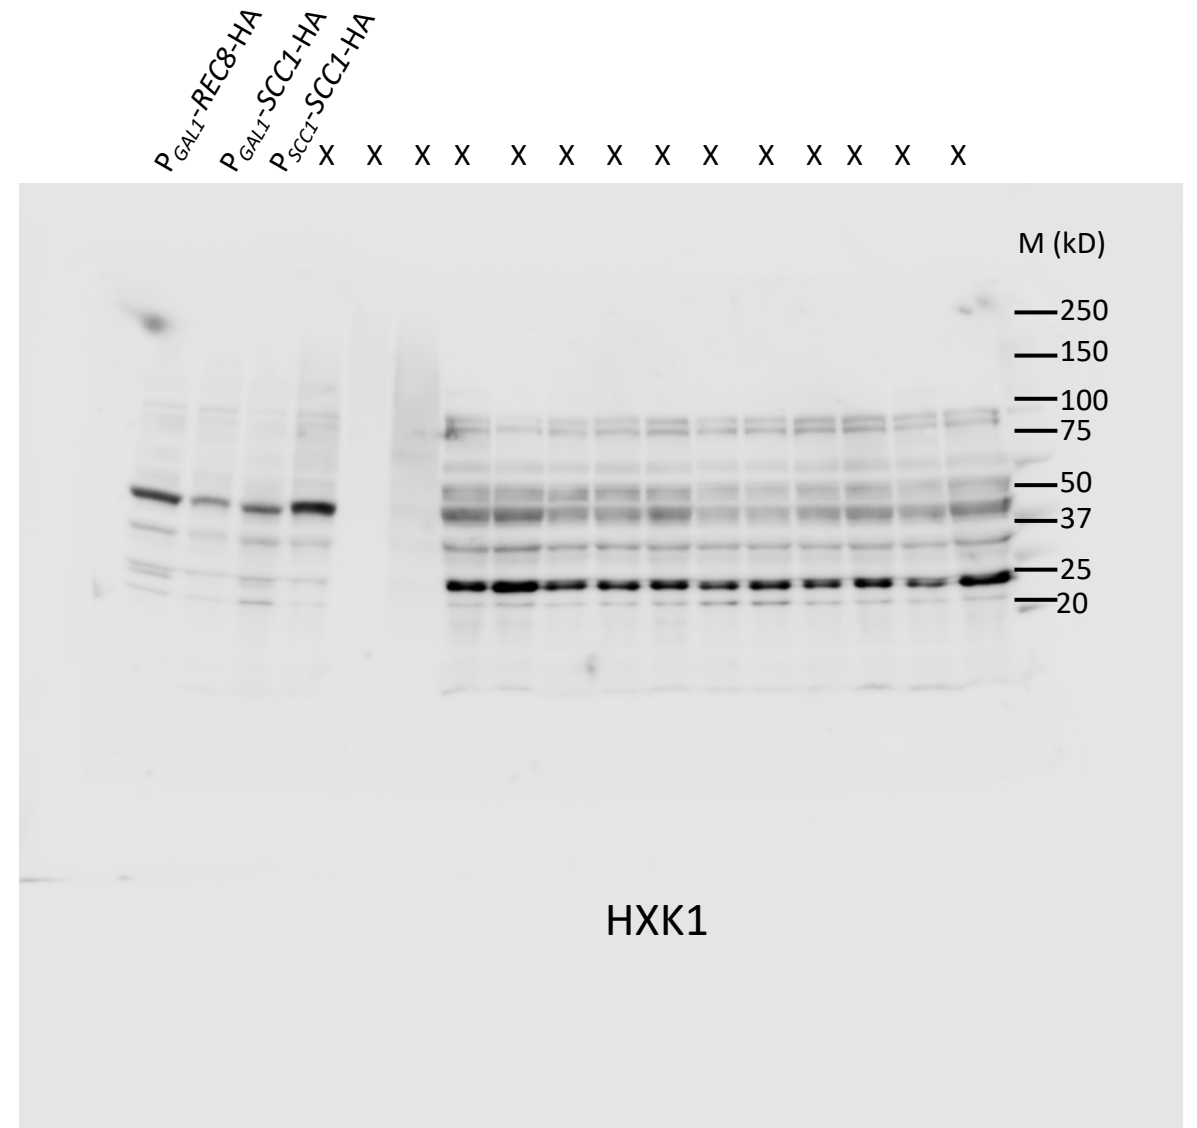

S10 Fig. Raw Image

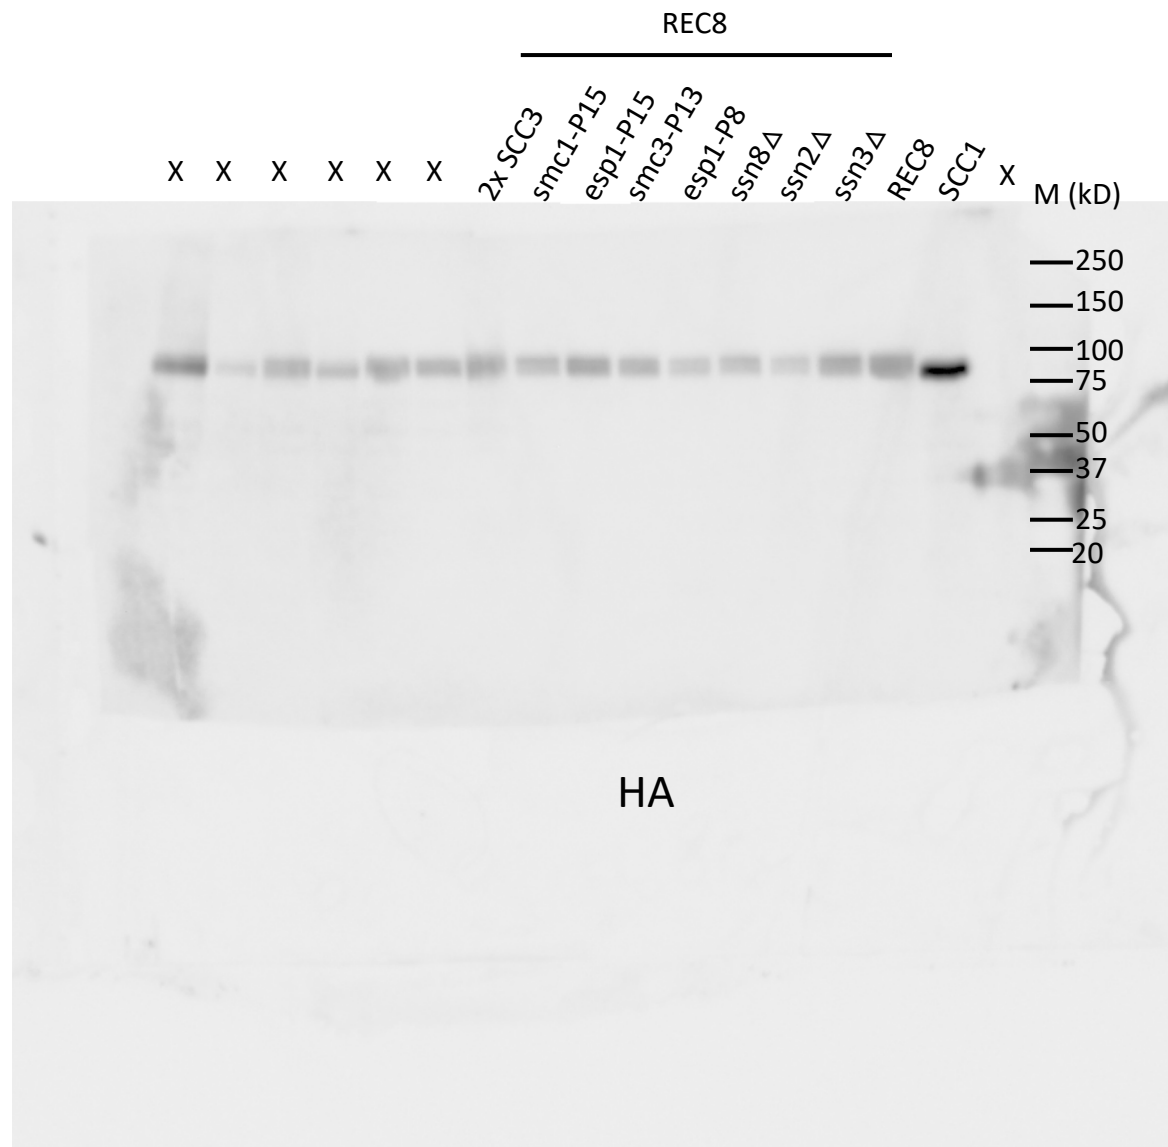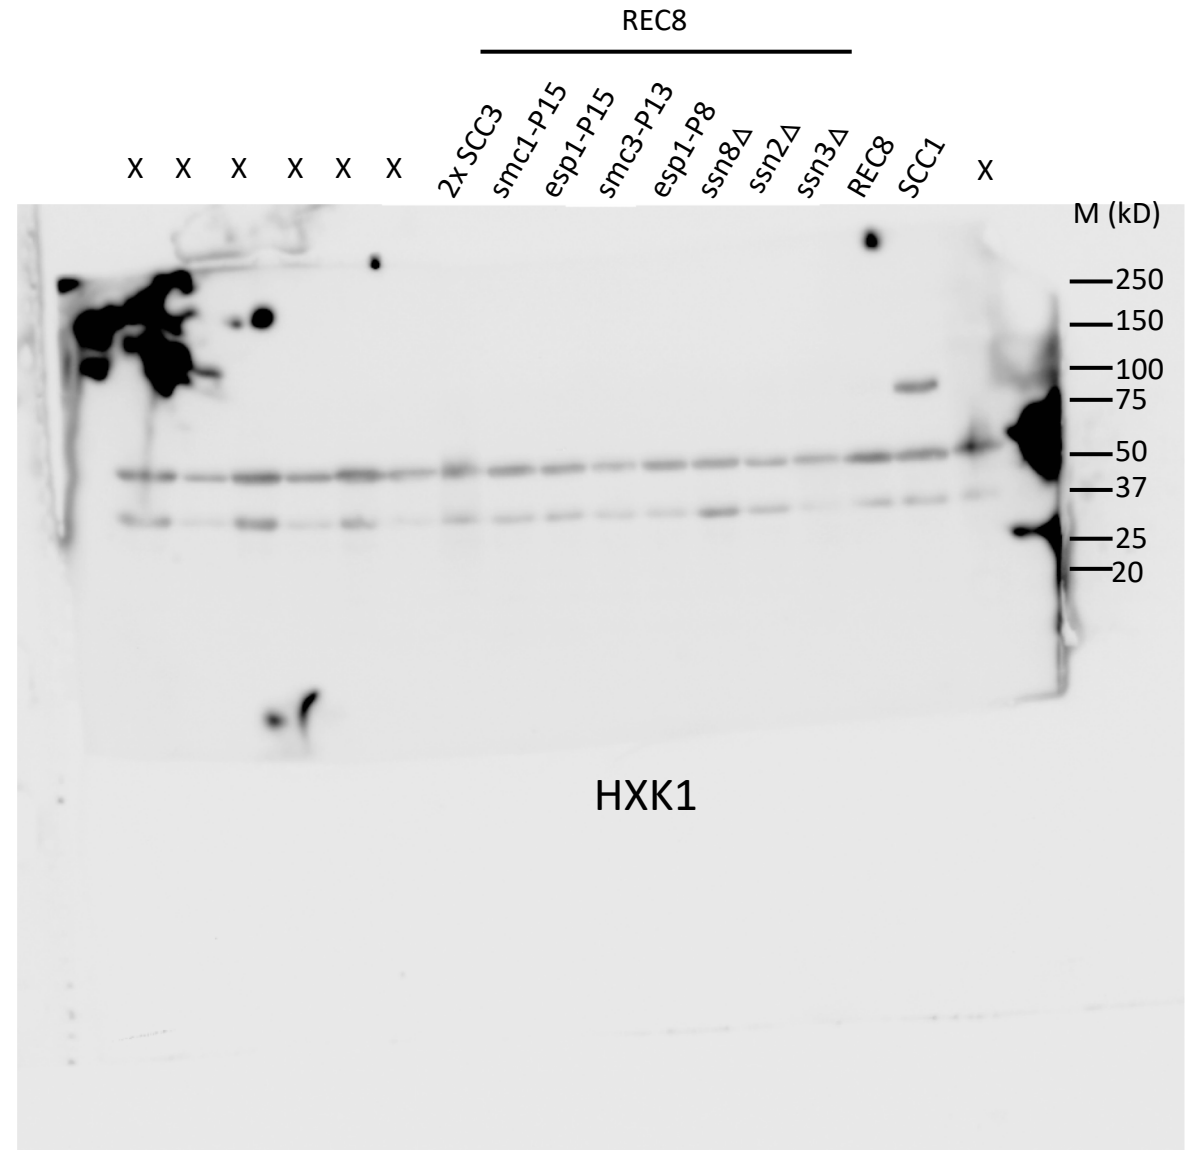

Supplement: pbio.3000635.s022.pdf [file pbio.3000635.s022.pdf]
